# Supplementary material for: Total Synthesis of a Marine Alkaloid—Rigidin E
Source: Mar Drugs. 2012 Jun 20;10(6):1412–21. doi: 10.3390/md10061412 (PMC3397449; doi:10.3390/md10061412)

## Supplementary Information

Figure S1.  $^1\text{H}$  NMR spectrum of compound 8

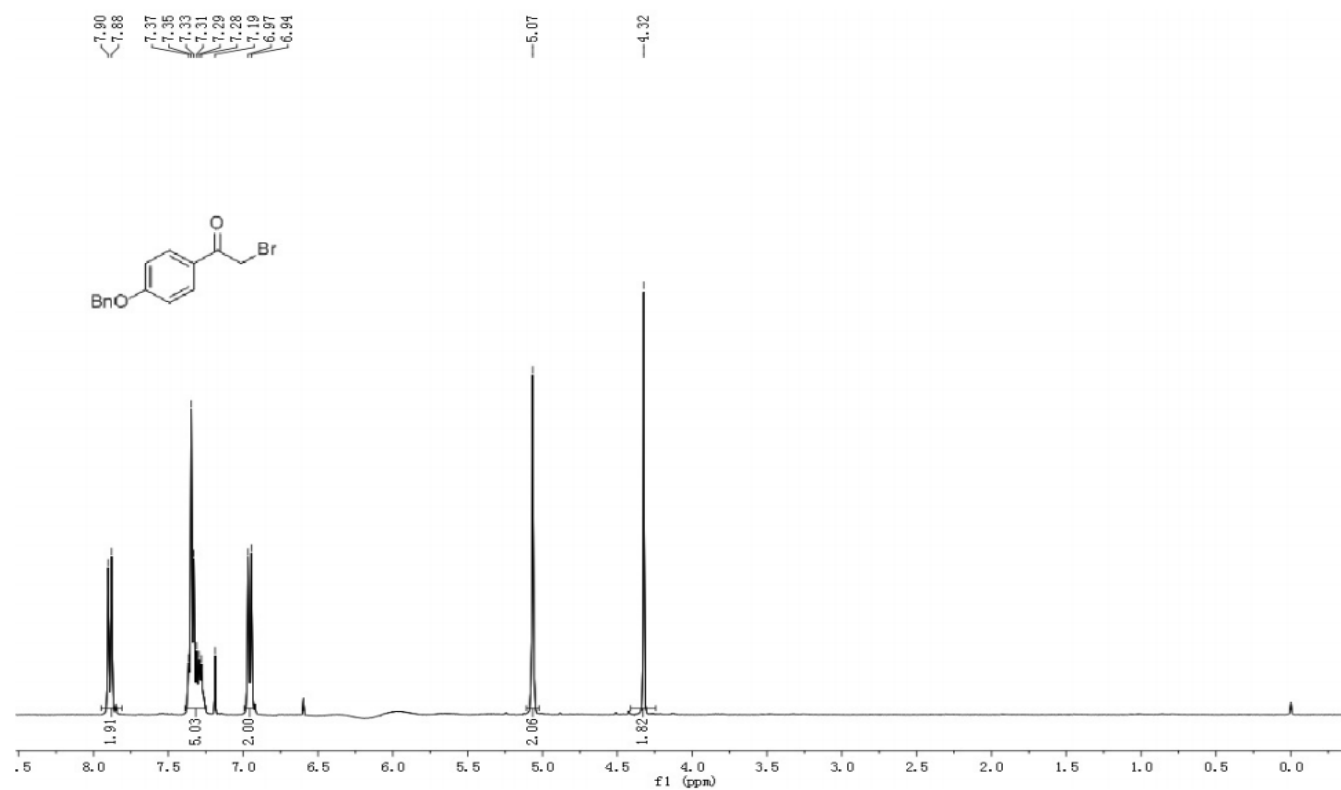

**Figure S2.  $^{13}\text{C}$  NMR spectrum of compound 8**

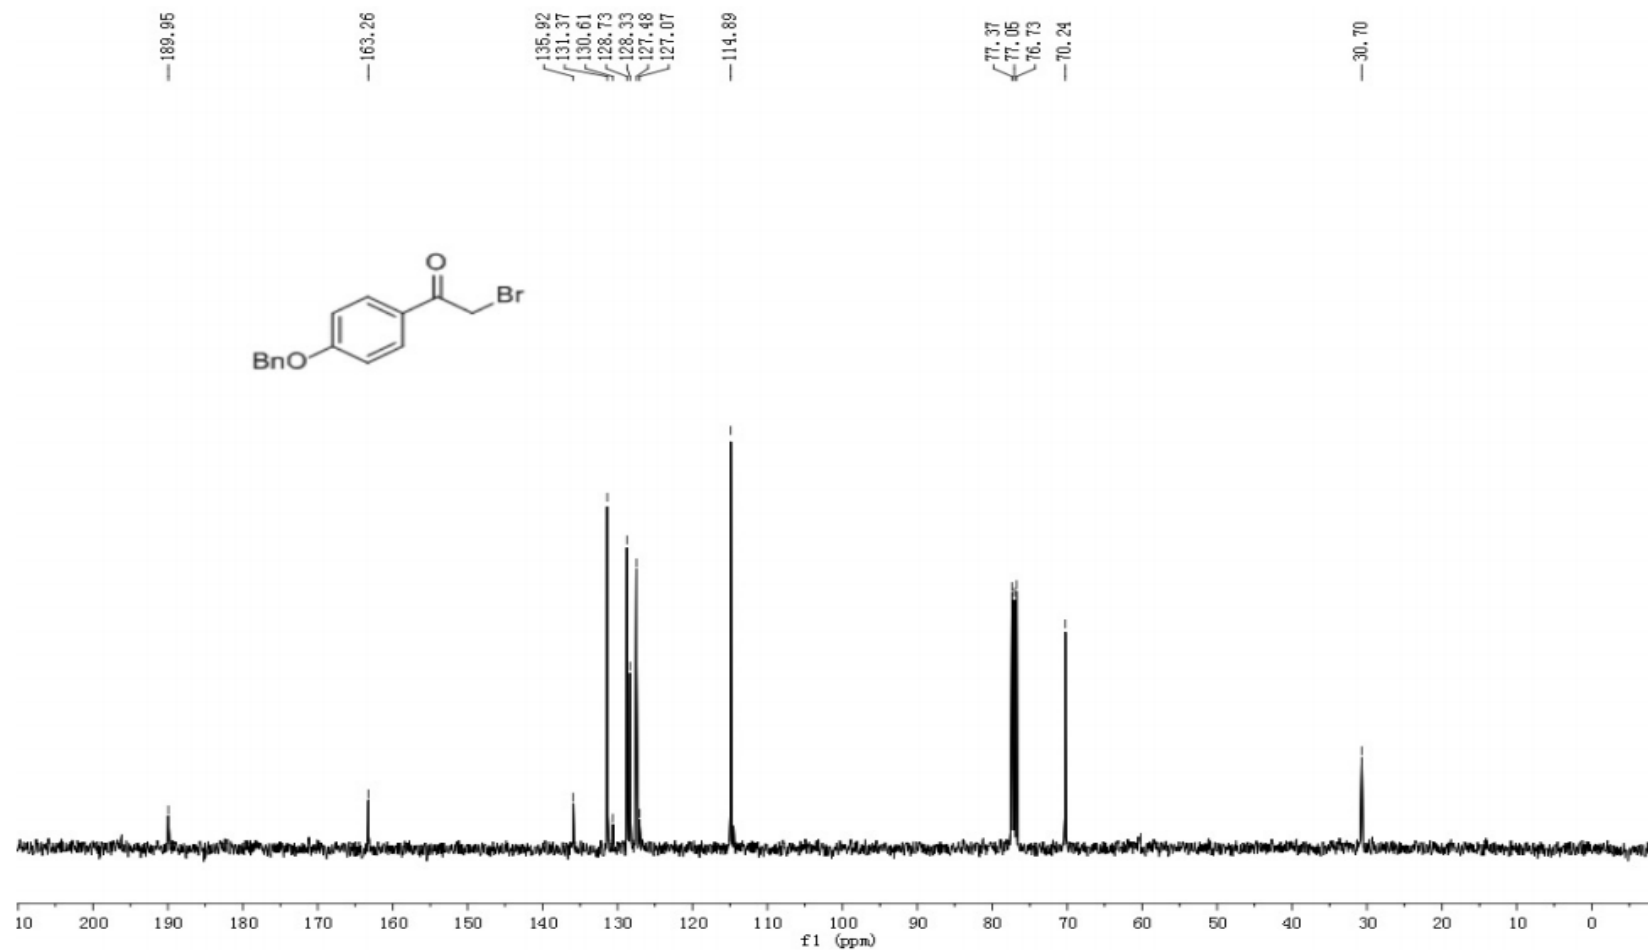

**Figure S3.  $^1\text{H}$  NMR spectrum of compound 10**

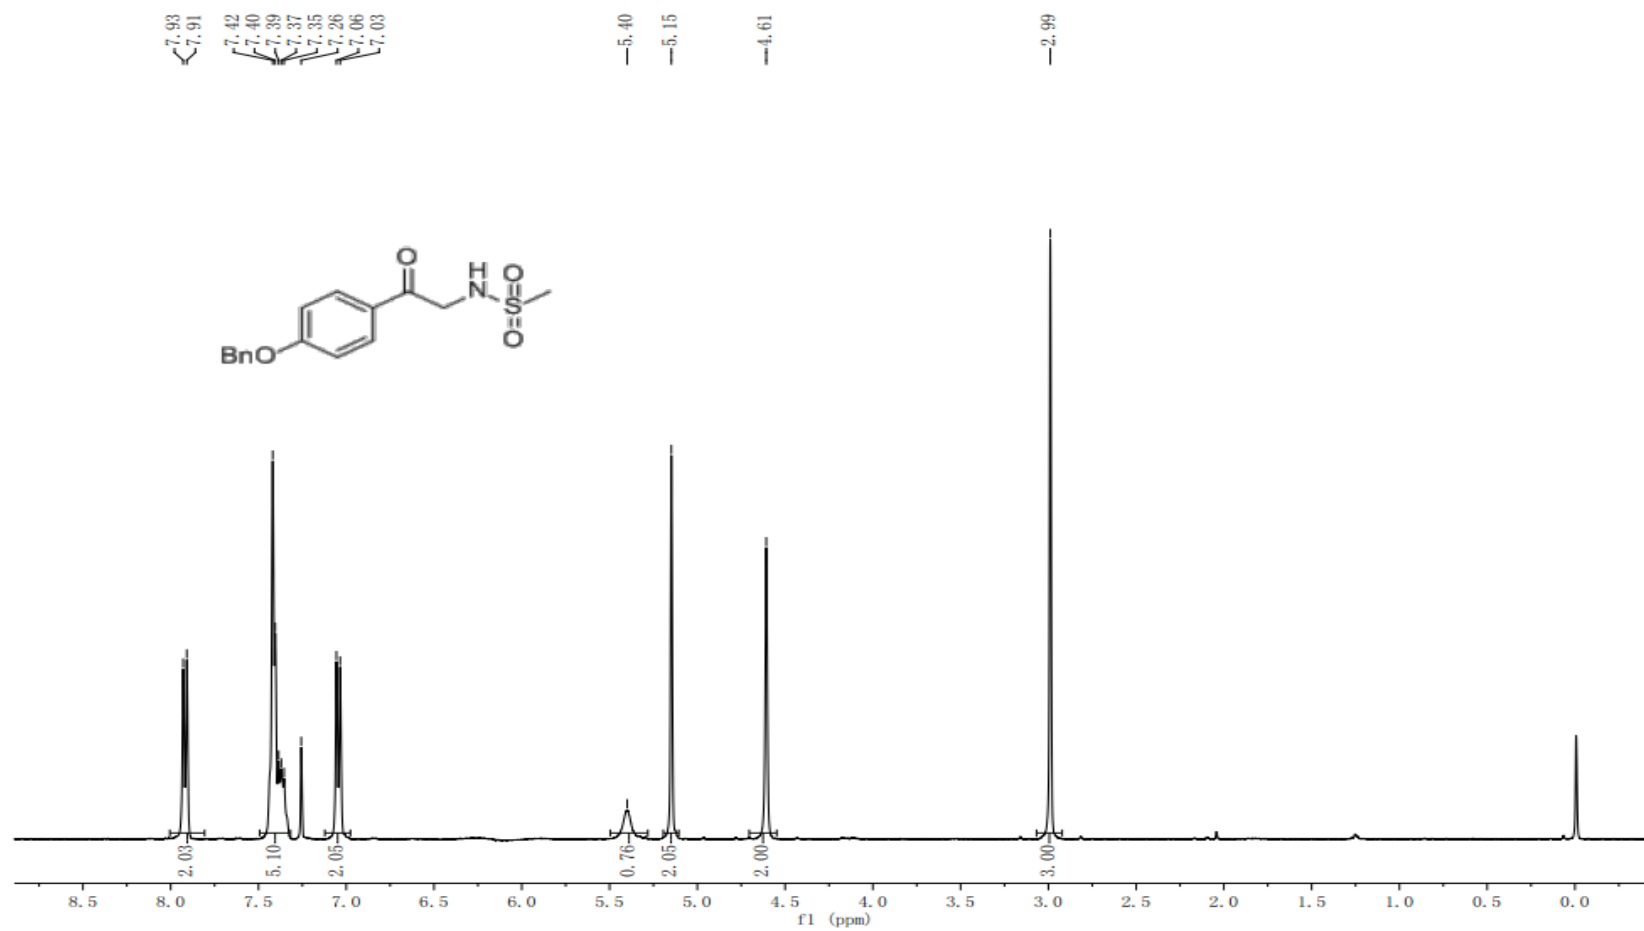

Figure S4.  $^{13}\text{C}$  NMR spectrum of compound 10

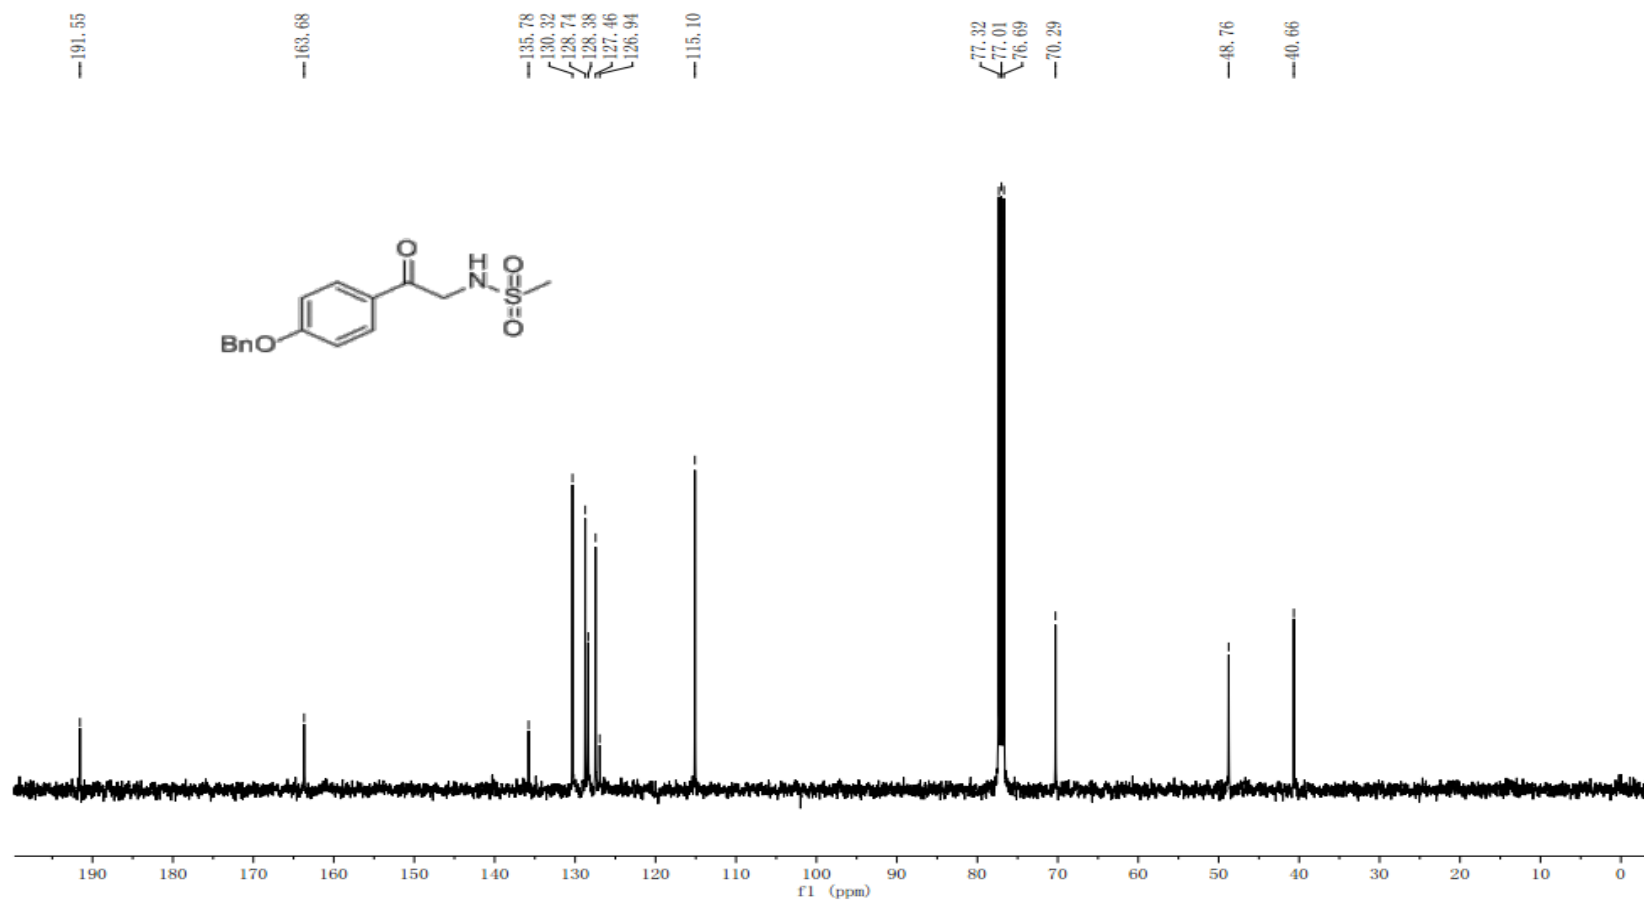

**Figure S5.  $^1\text{H}$  NMR spectrum of compound 12**

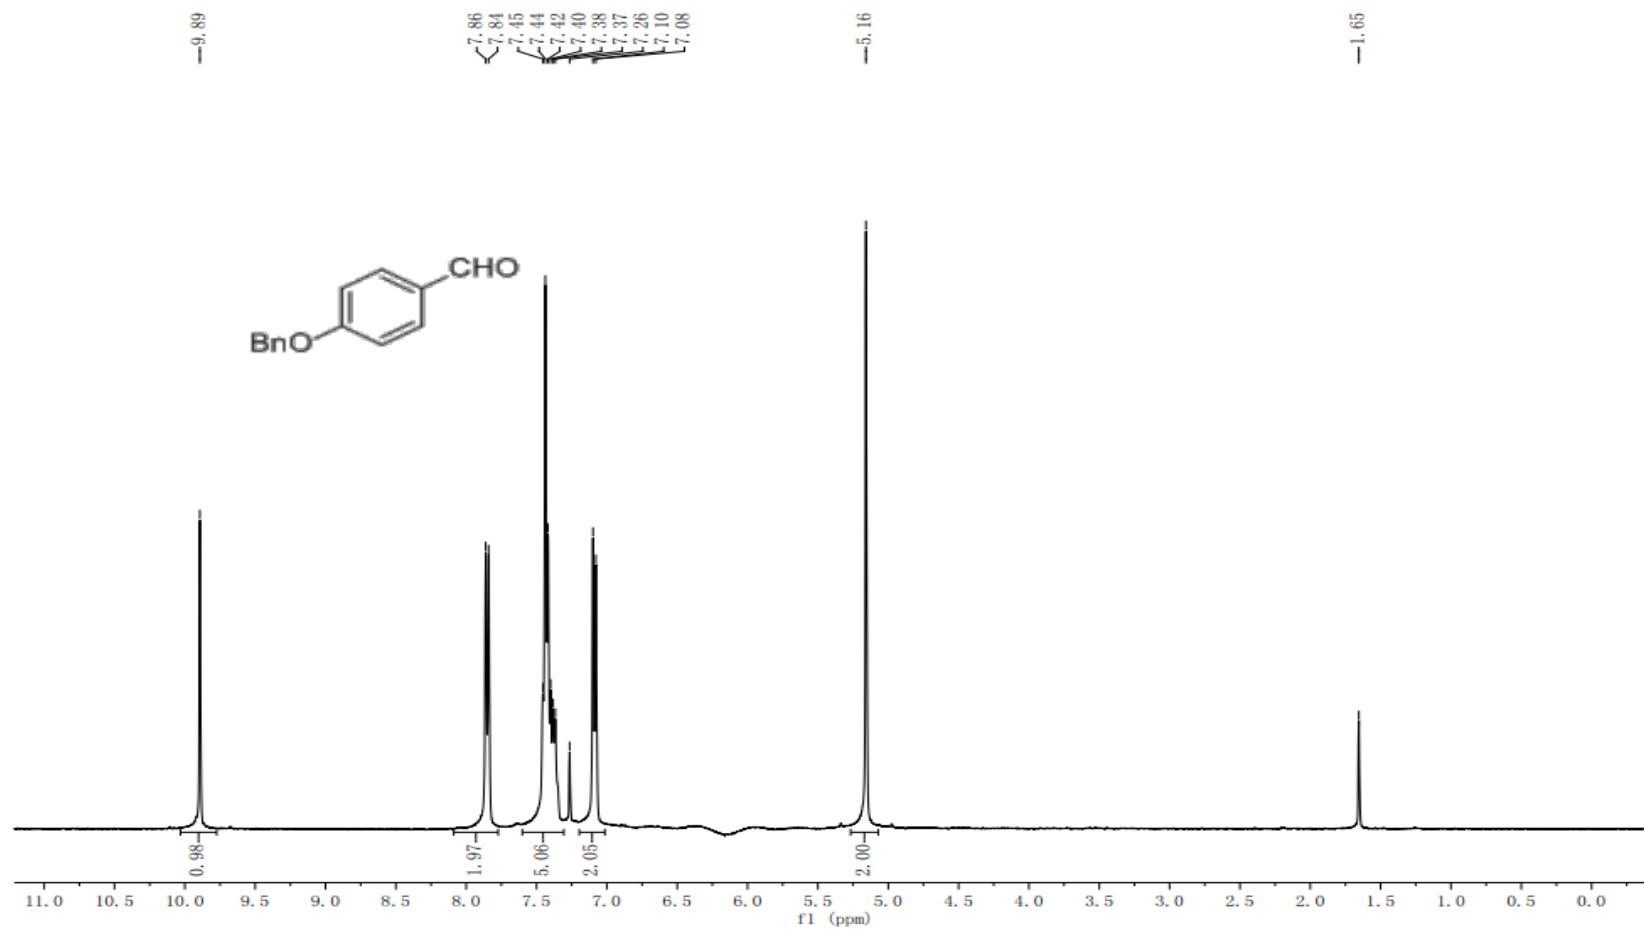

Figure S6.  $^{13}\text{C}$  NMR spectrum of compound 12

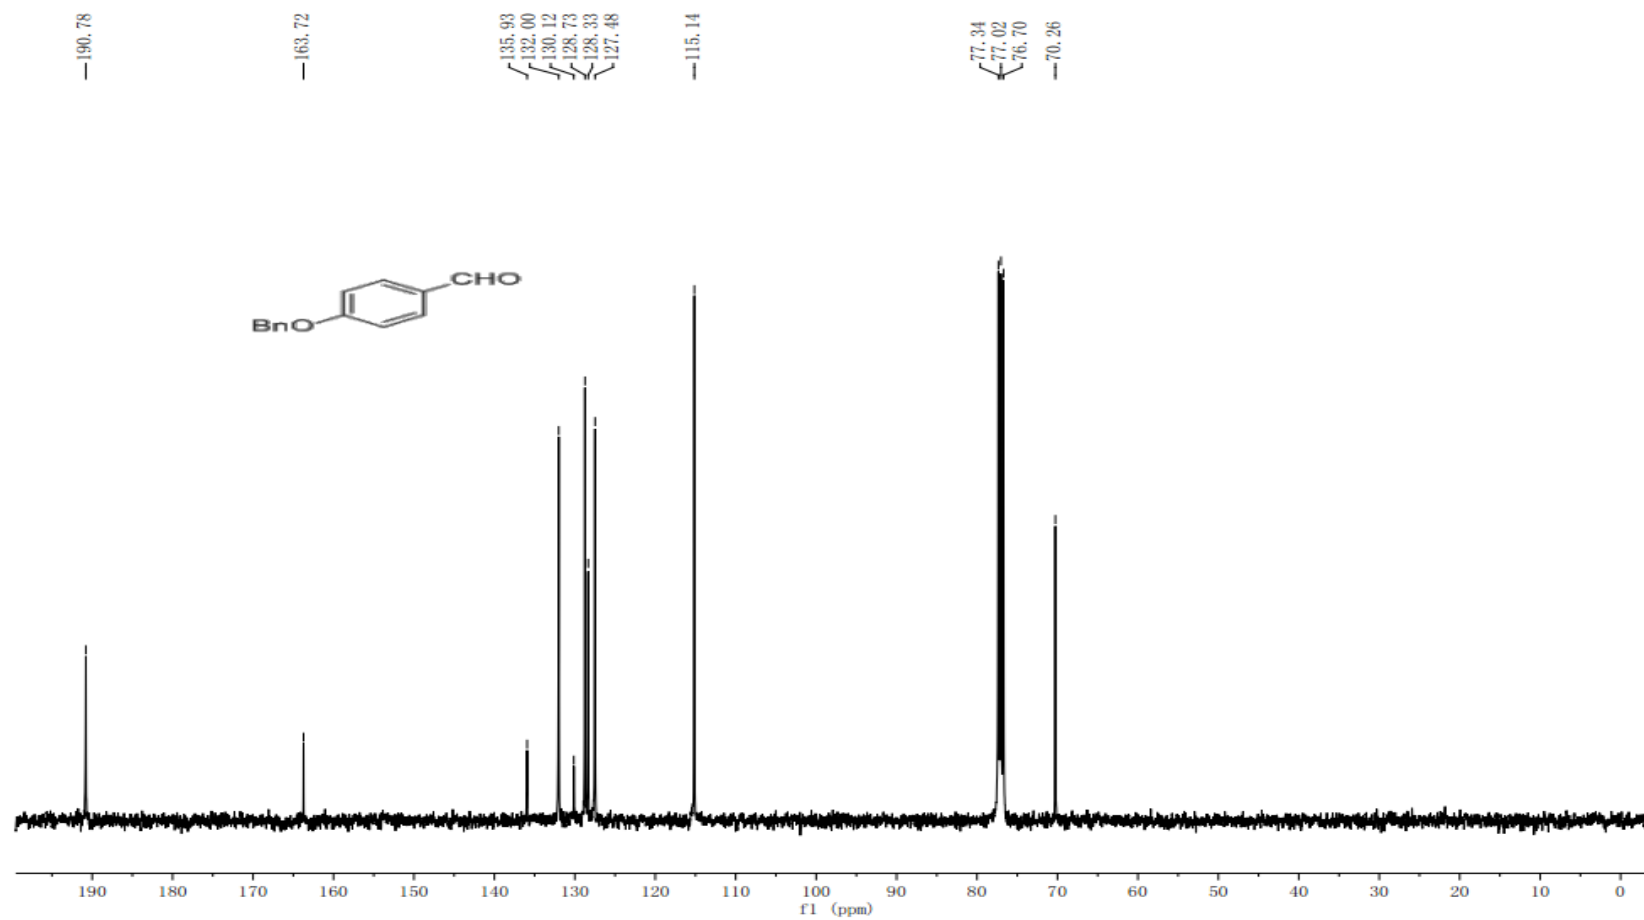

**Figure S7.  $^1\text{H}$  NMR spectrum of compound 11**

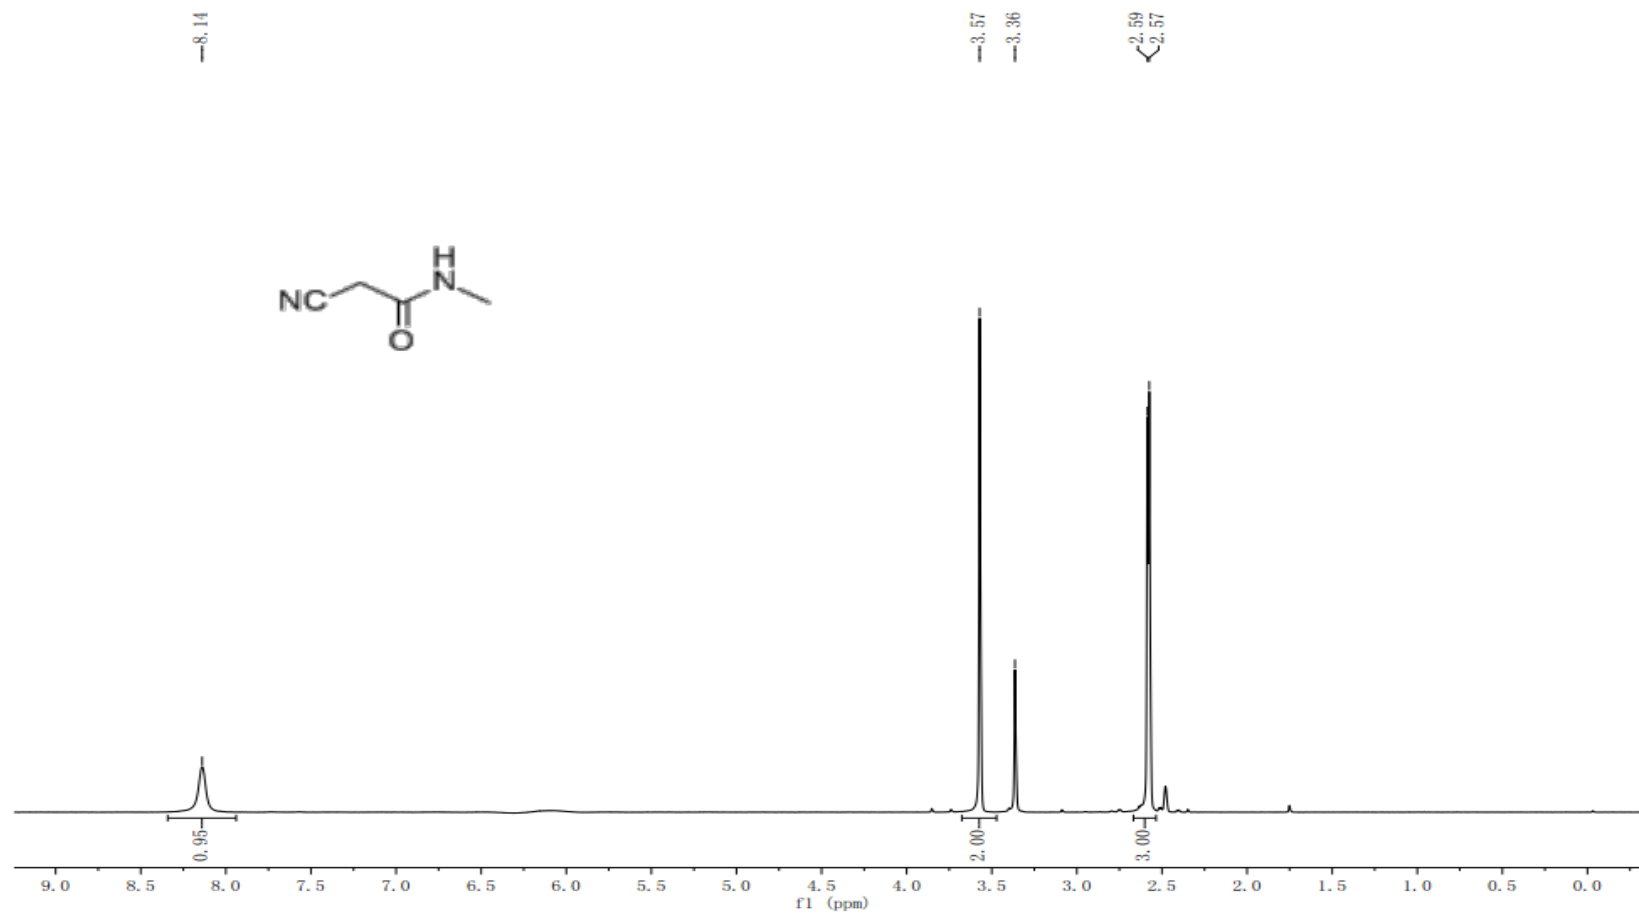

Figure S8.  $^{13}\text{C}$  NMR spectrum of compound 11

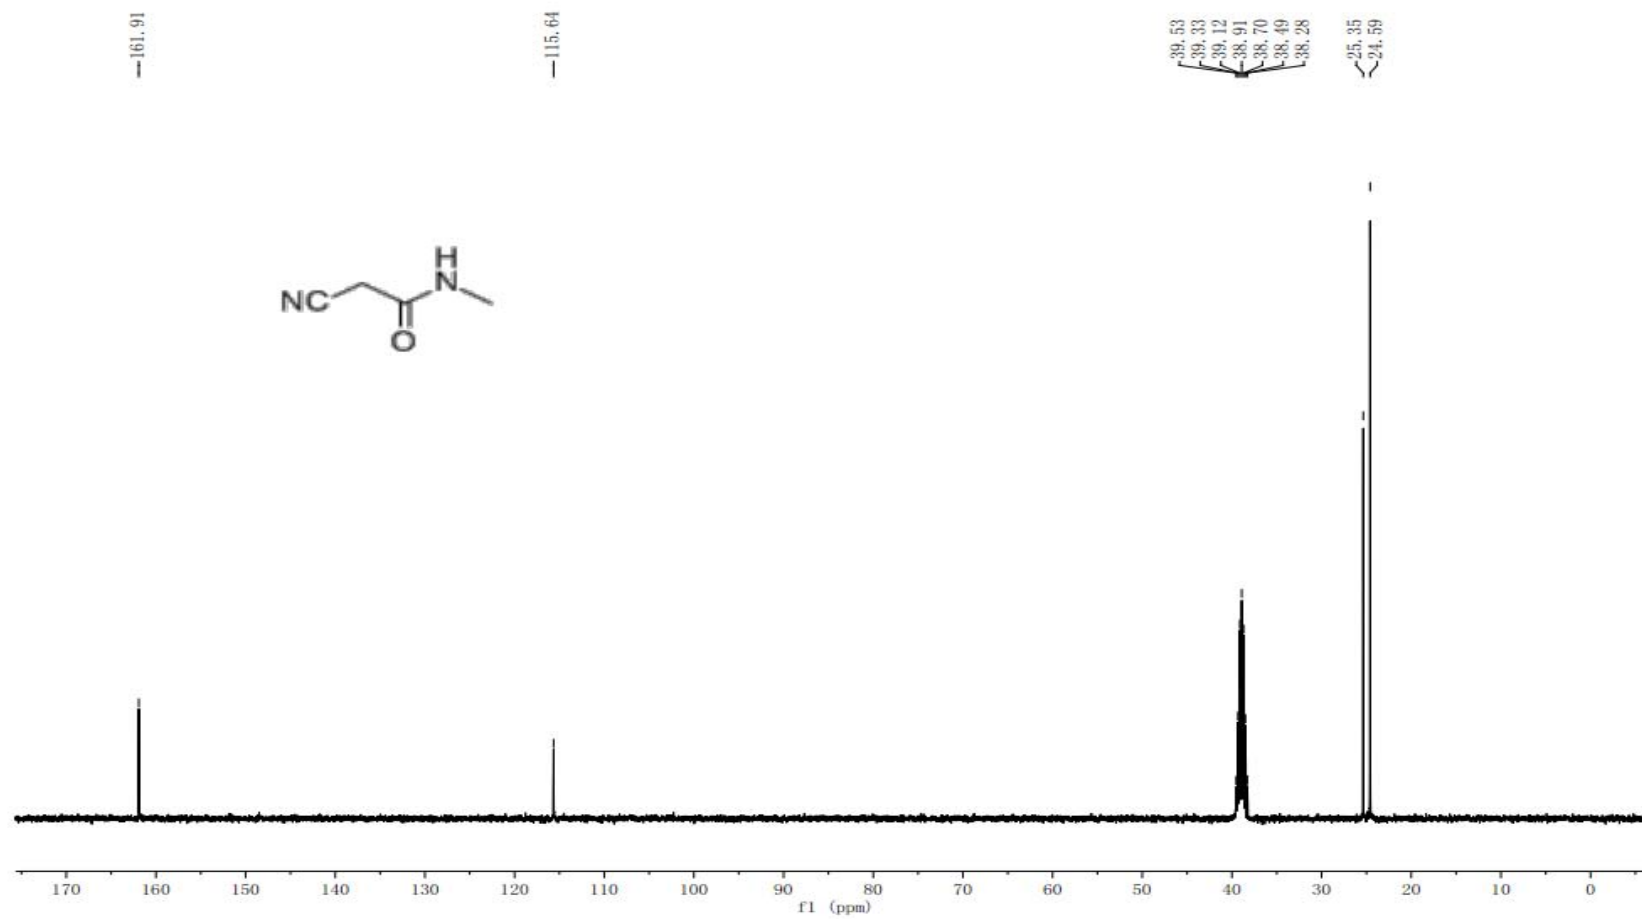

Figure S9.  $^1\text{H}$  NMR spectrum of compound 13

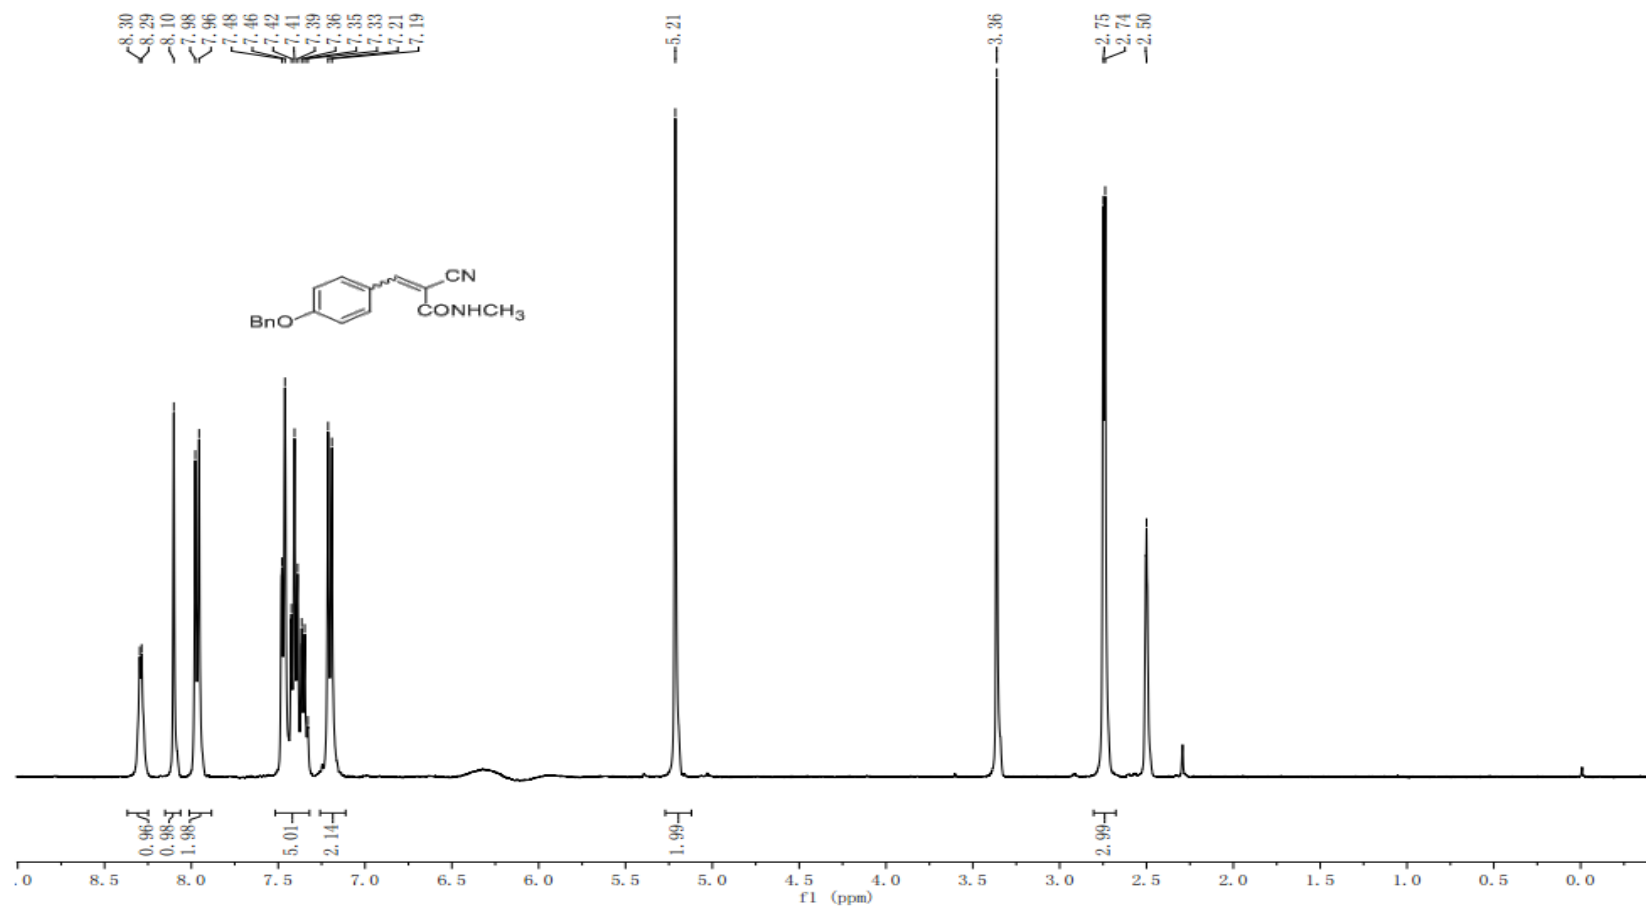

**Figure S10.  $^{13}\text{C}$  NMR spectrum of compound 13**

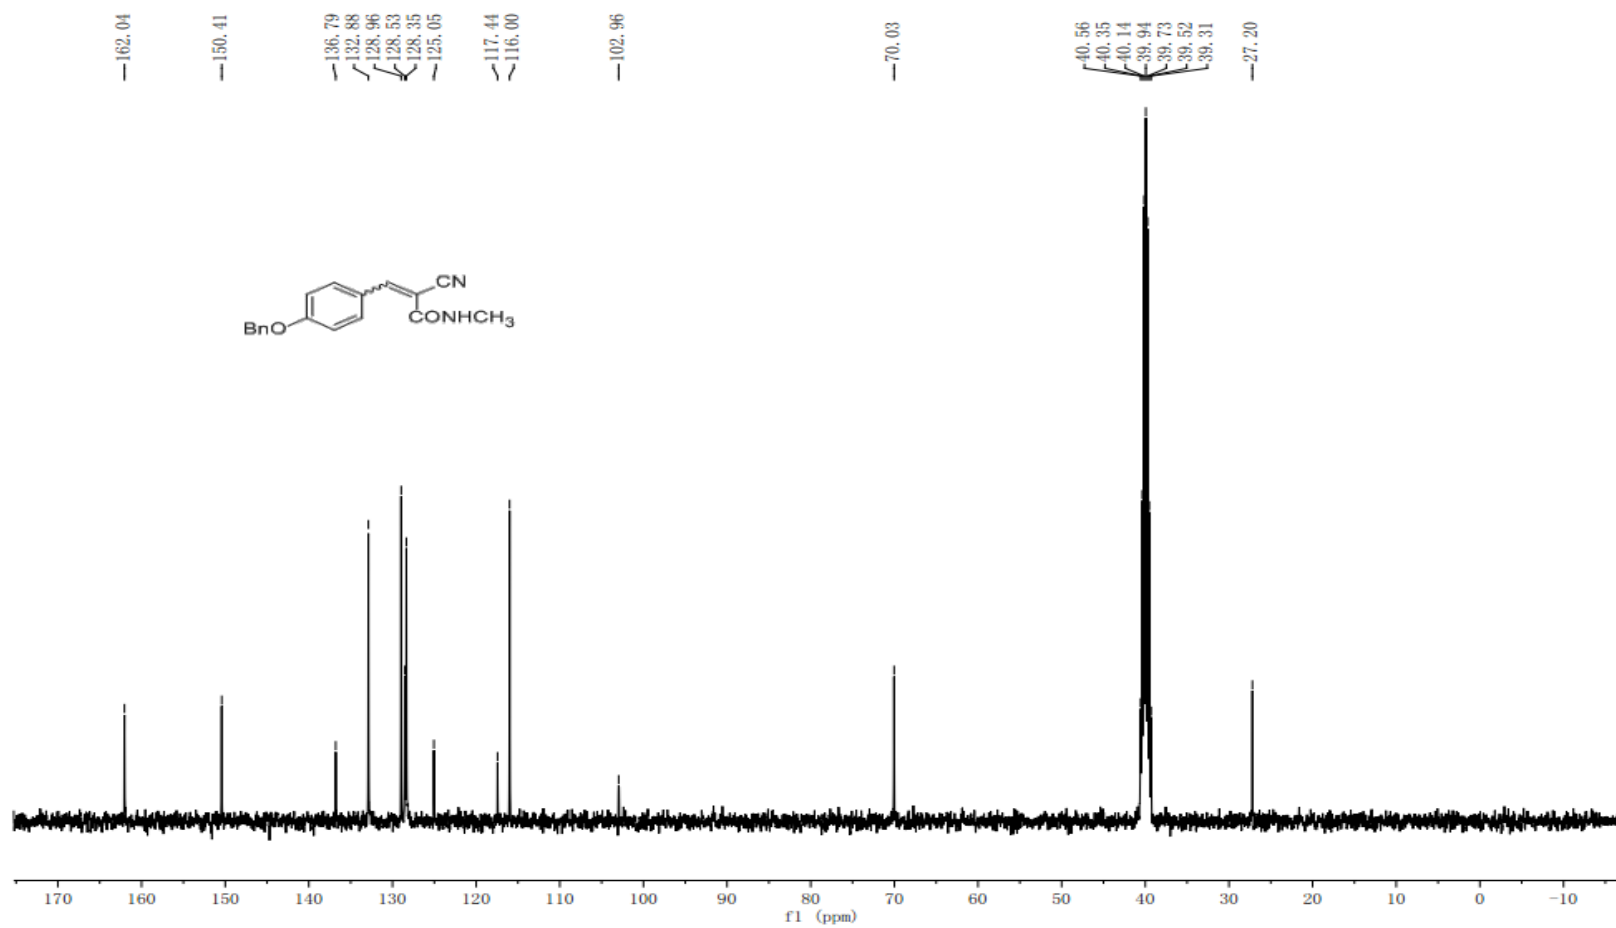

**Figure S11.  $^1\text{H}$  NMR spectrum of compound 14**

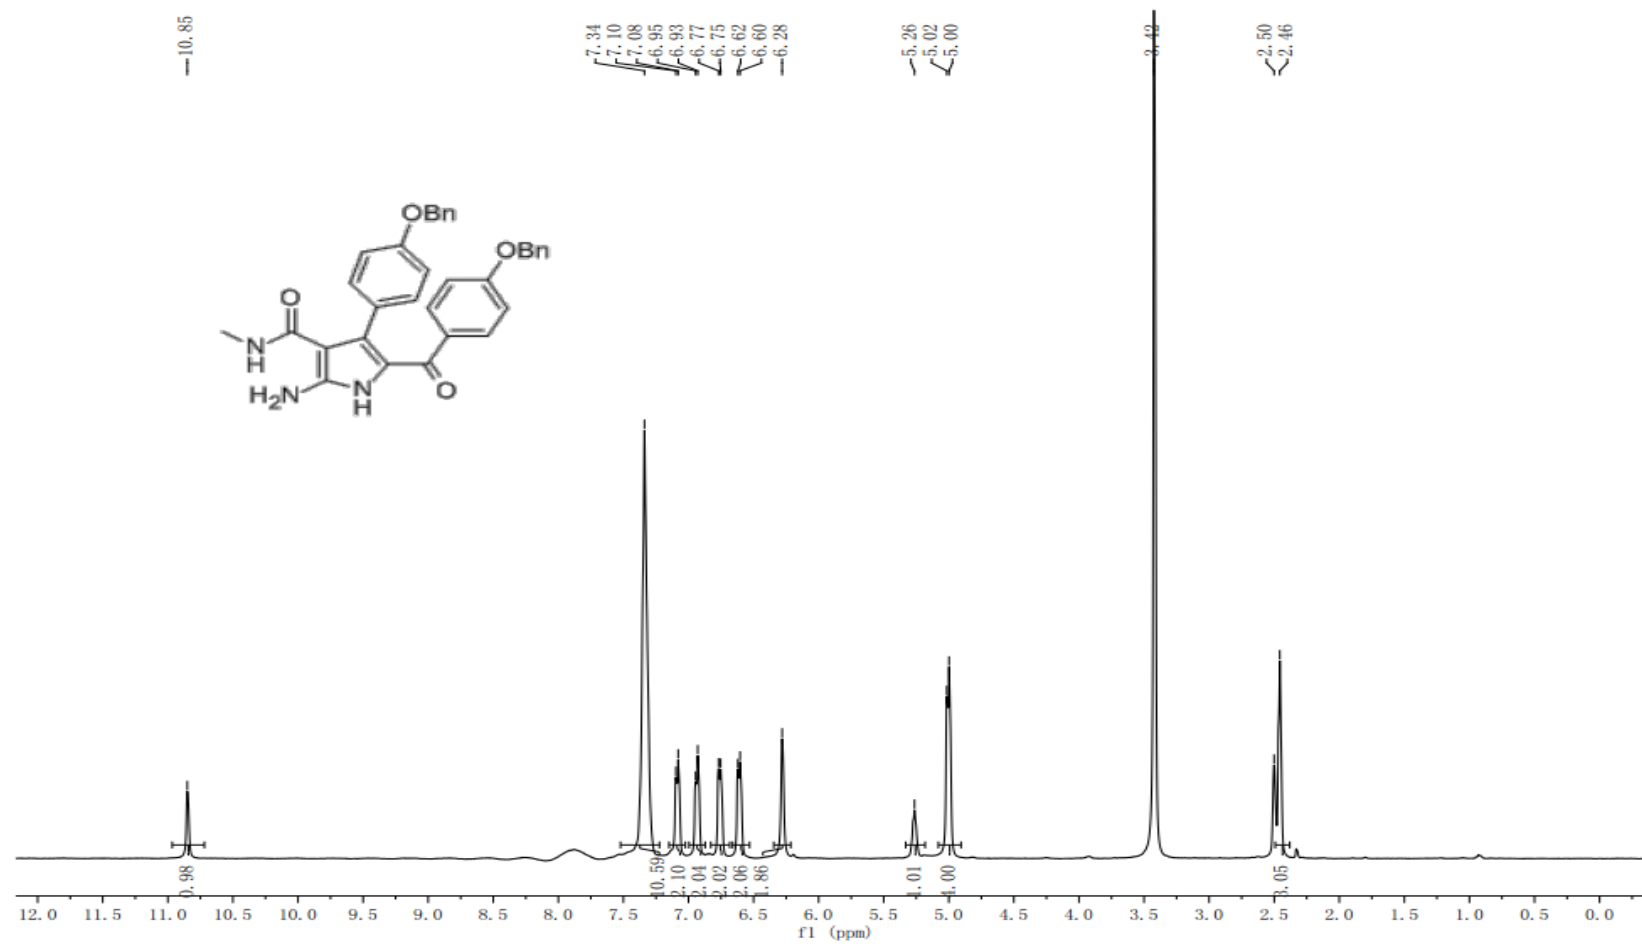

**Figure S12.  $^{13}\text{C}$  NMR spectrum of compound 14**

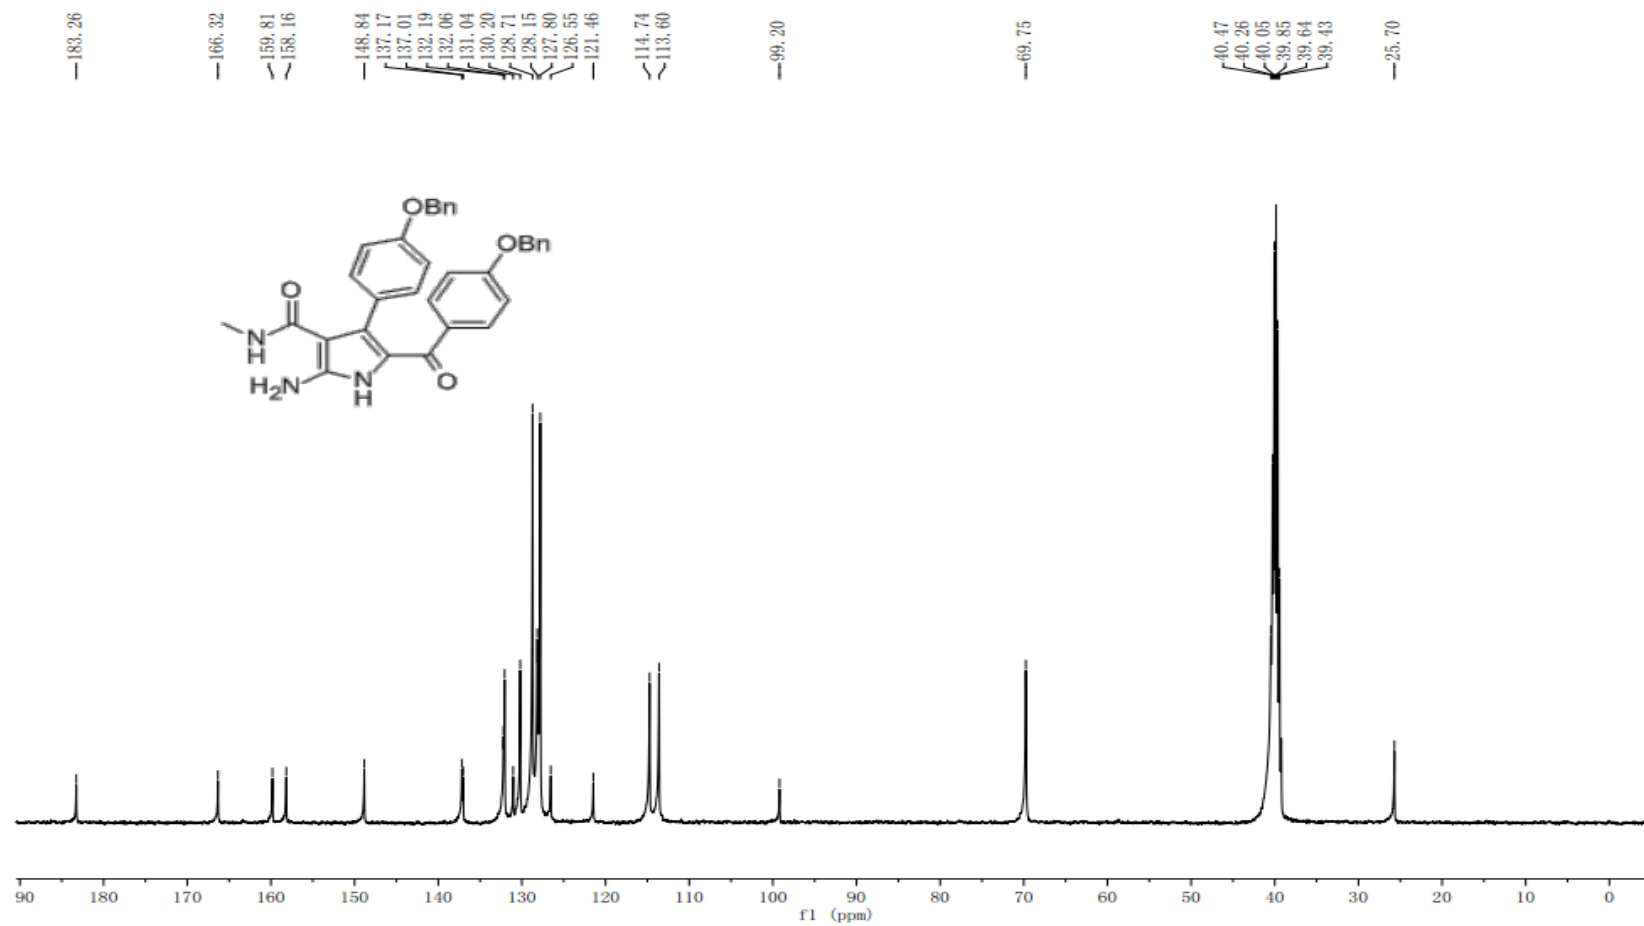

**Figure S13.  $^1\text{H}$  NMR spectrum of compound 15**

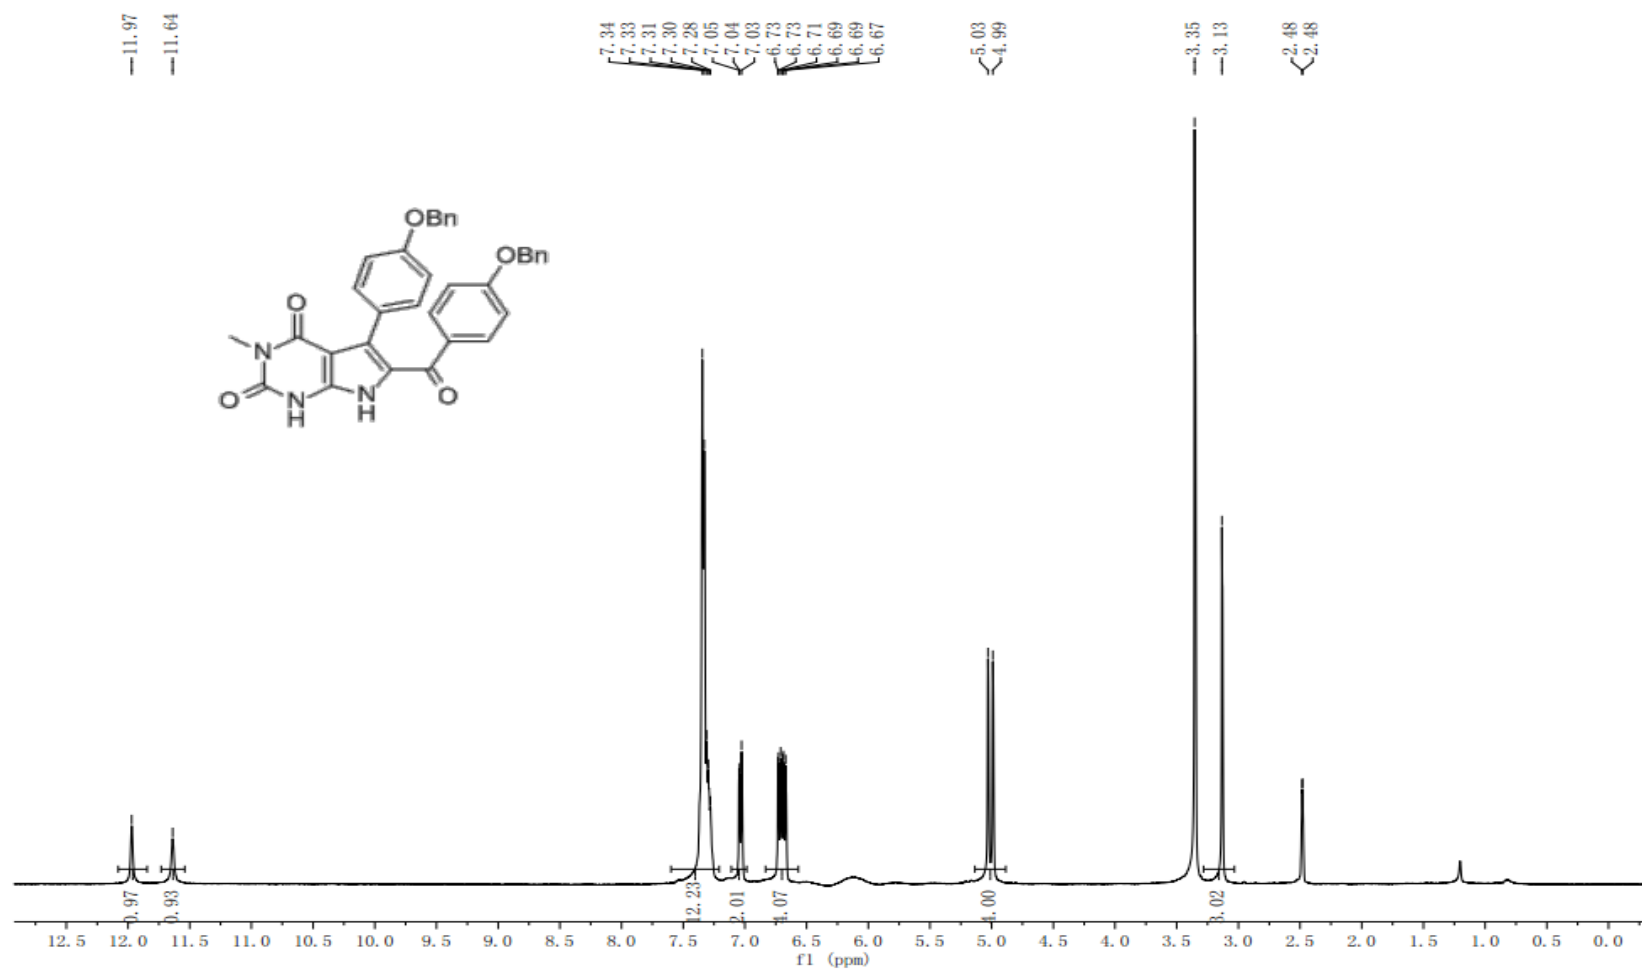

**Figure S14.  $^{13}\text{C}$  NMR spectrum of compound 15**

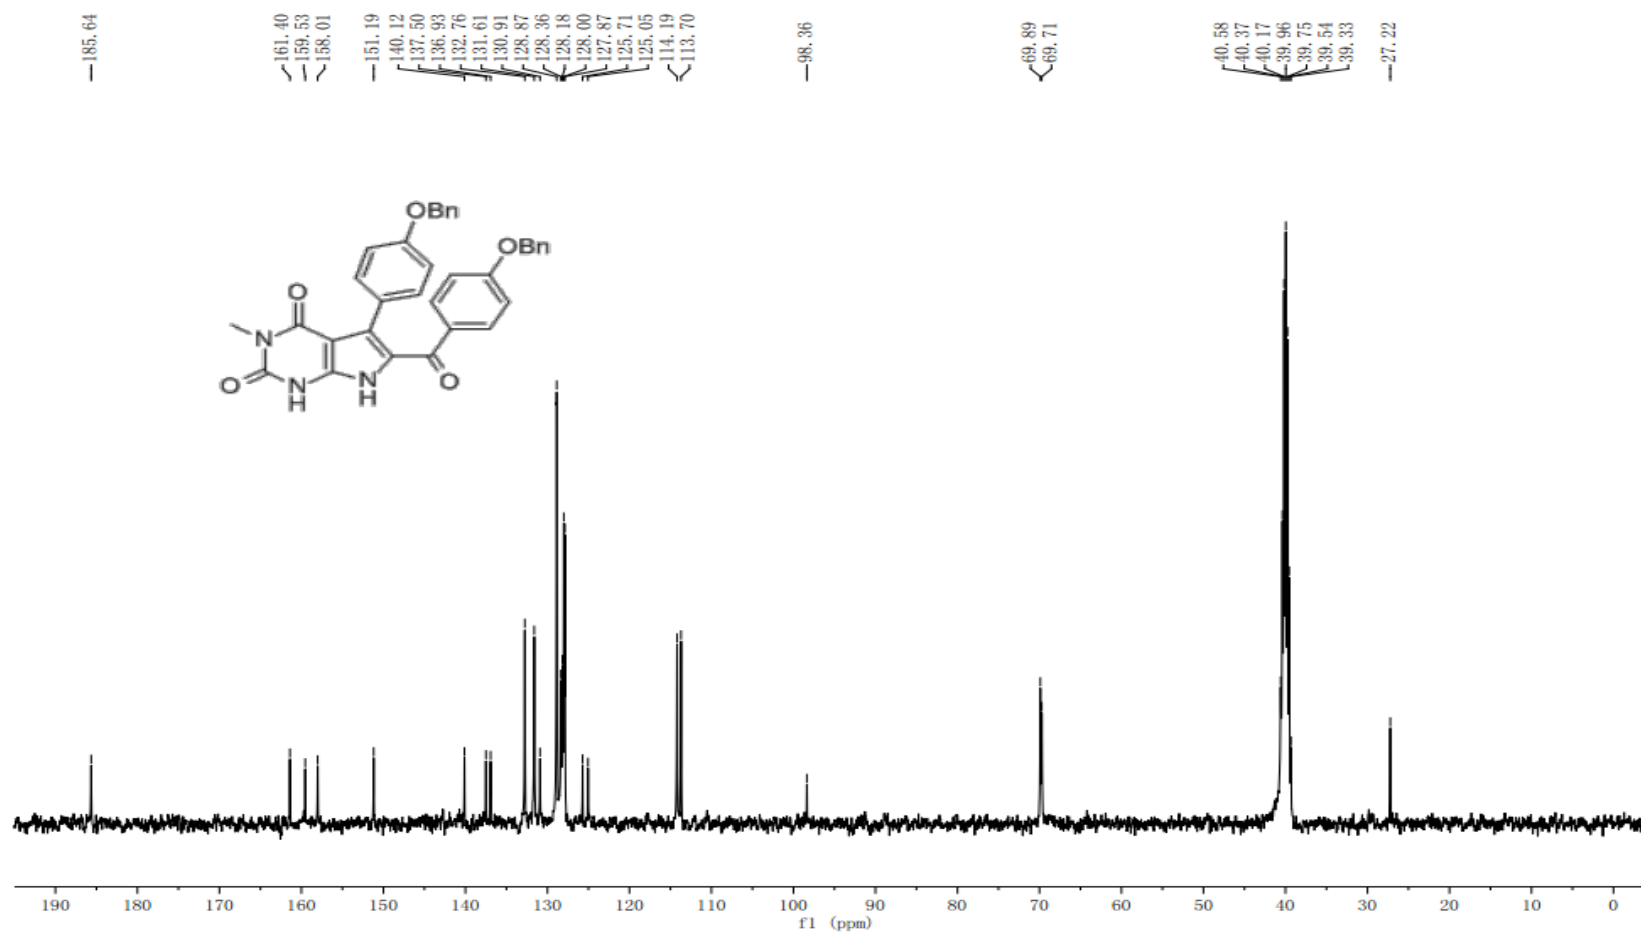

**Figure S15.  $^1\text{H}$  NMR spectrum of compound 5 (Rigidin E)**

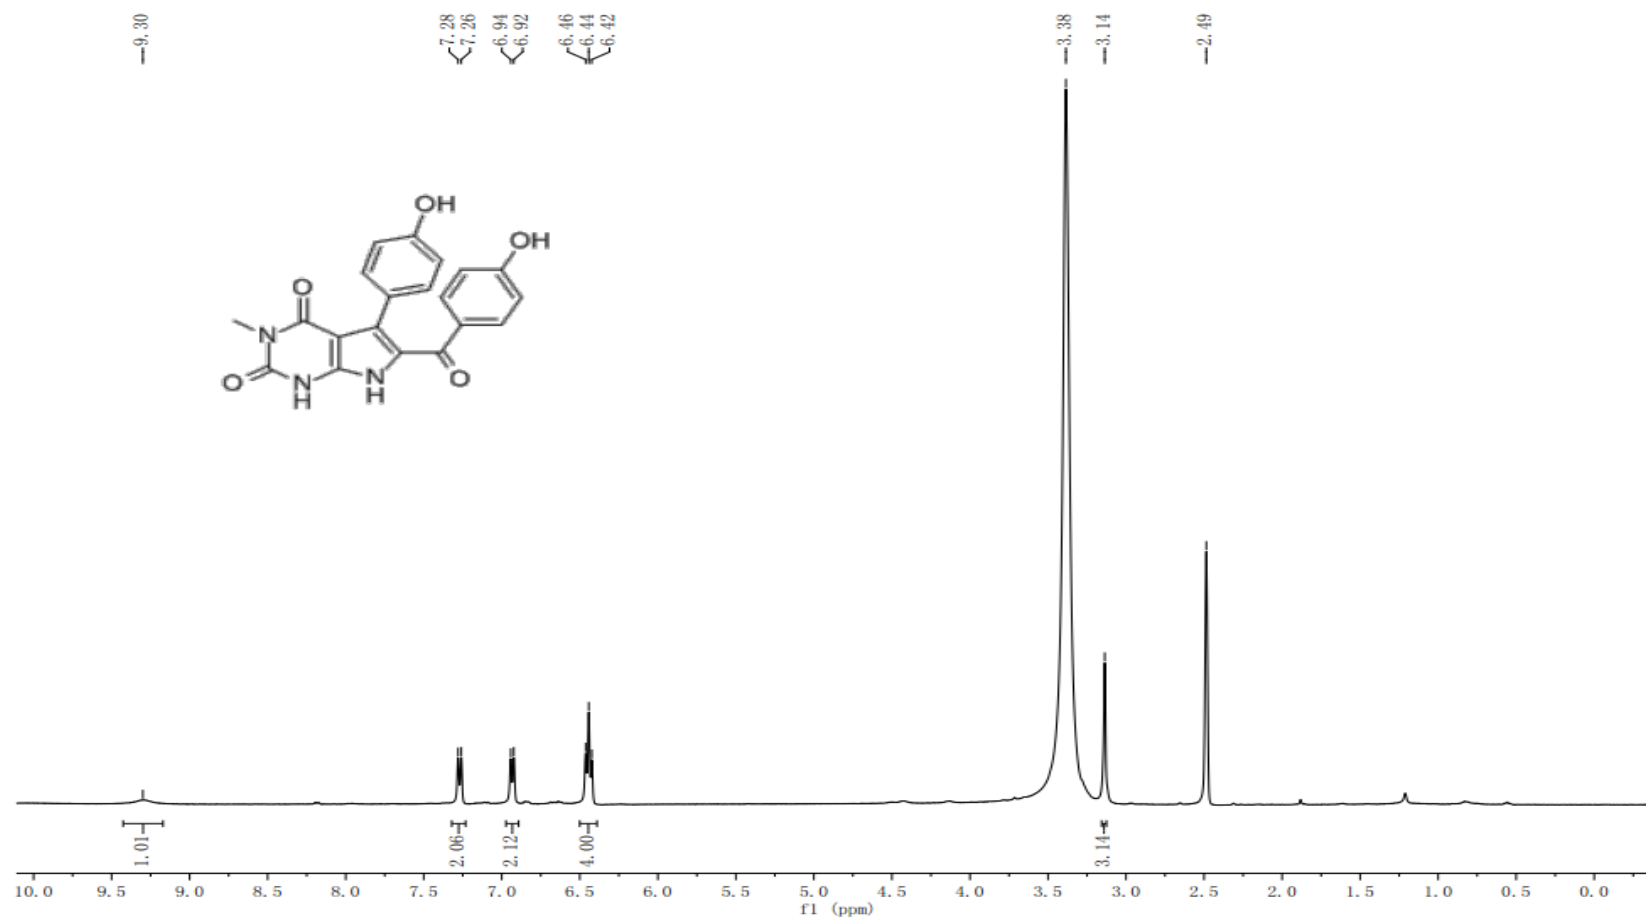

**Figure S16.  $^{13}\text{C}$  NMR spectrum of compound 5 (Rigidin E)**

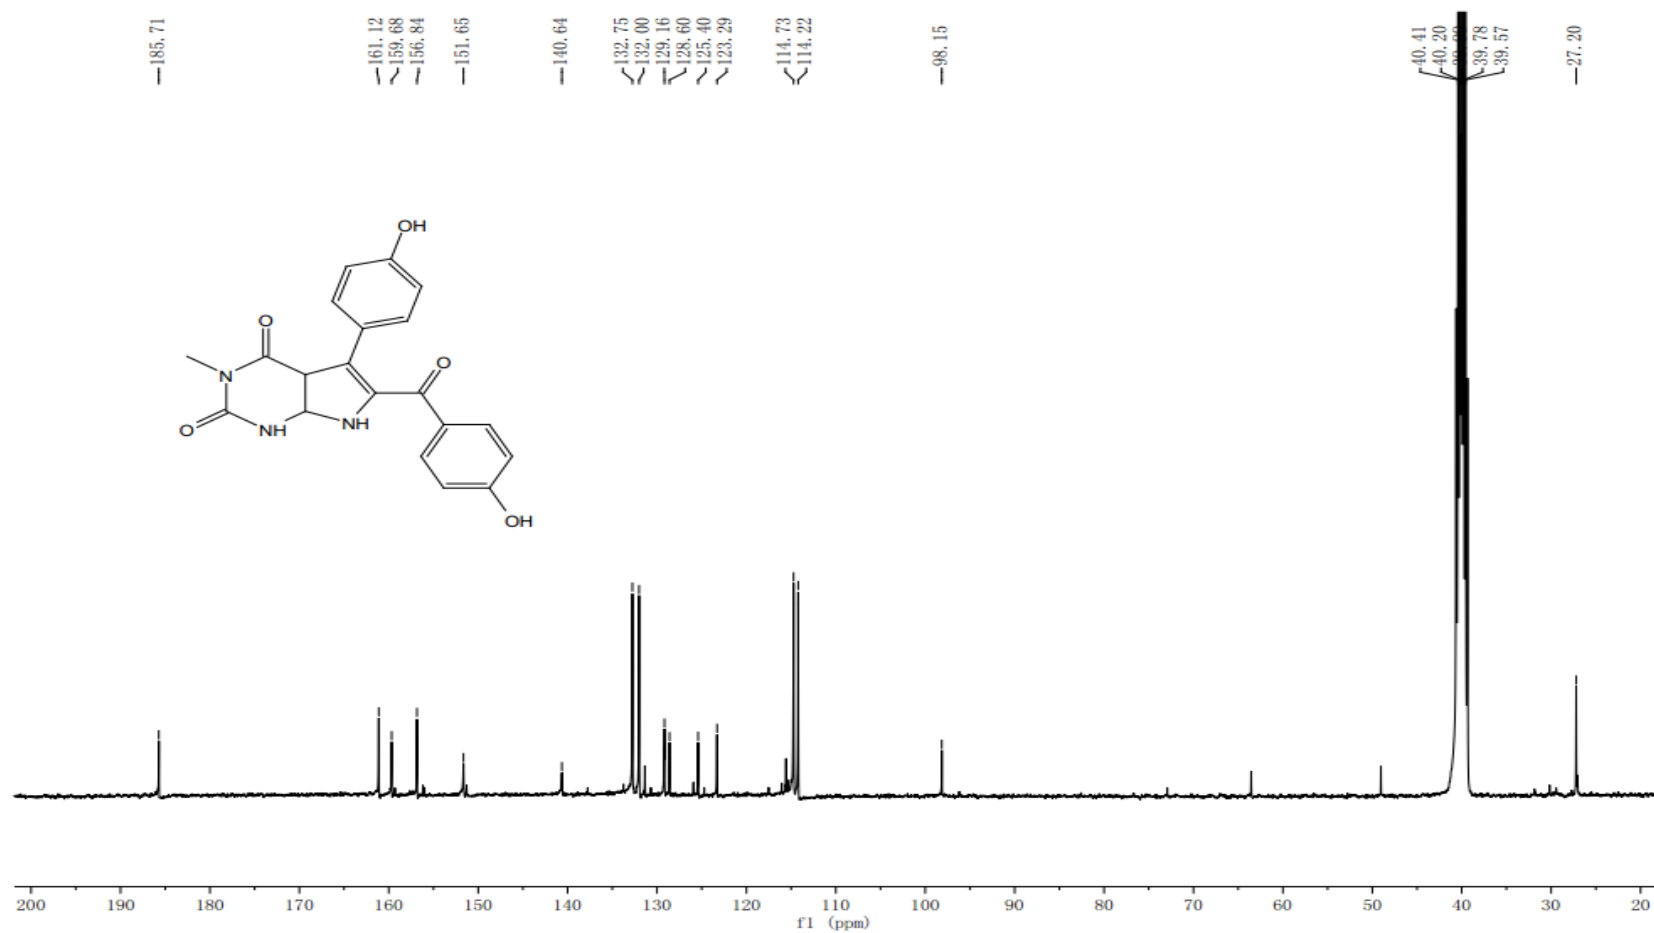

Supplement: Supplementary File 1: — PDF-Document (PDF, 689 KB) [file marinedrugs-10-01412-s001.pdf]
